# Supplementary material
Source: Springer Nature journal article supplement (http://www.springermedizin.de/resource/supplementary/12937_2012_533_MOESM4_ESM.pdf/25653566)

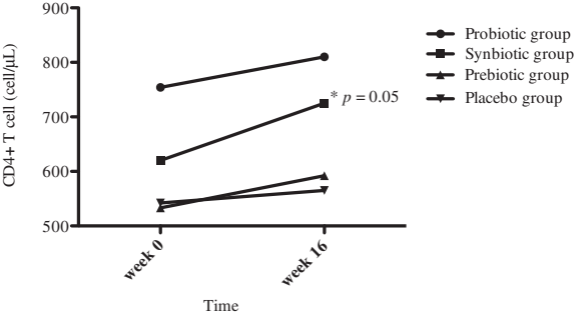

Supplement: MOESM4 [file 25653566]
